# Supplementary material for: Child-OIDP index in Brazil: Cross-cultural adaptation and validation
Source: Health Qual Life Outcomes. 2008 Sep 15;6:68. doi: 10.1186/1477-7525-6-68 (PMC2553067; doi:10.1186/1477-7525-6-68)
Supplement: Additional File 1 — Brazilian Child-OIDP. Instructions, questionnaire and record form of the Brazilian Child-OIDP index. [file 1477-7525-6-68-S1.pdf]

# **Índice de Impactos Odontológicos no Desempenho das Atividades Diárias da Criança (OIDP-Infantil)**

## **Instruções para aplicação**

### **Identificação**

A identificação da criança deve ser preenchida antes da aplicação do questionário.

### **Etapas da Entrevista**

#### **1ª Etapa: Identificar os problemas bucais percebidos pelas crianças**

A entrevista começa com a Folha 1, entregue a todas as crianças presentes em sala de aula, sendo que o professor deve ler as perguntas. A criança deverá marcar com um X o(s) problema(s) que tem ou teve nos últimos 3 (três) meses (dar uma referência dizendo o nome do mês em que se iniciou o período, de acordo com a data da entrevista. Ex: se a entrevista é no mês de março, dizer “desde o mês de janeiro”).

#### **2ª Etapa: Avaliação dos impactos bucais na qualidade de vida das crianças**

A entrevista individual conta com o auxílio de uma lista completa dos problemas bucais (Folha 1) e a escala analógica e facial (Quadro 1).

As respostas serão anotadas no Formulário de Registro OIDP-Infantil (Folha 2).

### **Inicie a entrevista**

#### **Instruções para o preenchimento da Folha 1**

*Entregue a Folha 1 e leia para as crianças:*

Isto não é prova. Não existe resposta certa ou errada. Sinta-se à vontade para responder as perguntas. Suas respostas são muito importantes porque elas ajudarão os dentistas a entenderem pessoas como você e adotarem um tratamento dentário adequado às necessidades. Portanto, pense com cuidado antes de responder o que realmente aconteceu com você. (Em seguida, leia o item “1ª Etapa” da Folha 1 para as crianças e aguarde que elas respondam)

#### **Instruções para o preenchimento da Folha 2**

*A criança deve estar com a Folha 1 respondida em mãos. Em seguida, passe ao preenchimento da Folha 2.*

*Leia para as crianças:*

Considerando as suas respostas sobre os problemas que você teve com seus dentes e boca nos últimos três meses, eu gostaria de saber como eles afetaram o seu dia a dia.

Nos últimos três meses, algum destes problemas, marcados na Folha 1 (aponte para a folha), causou dificuldade para \_\_\_\_\_? (LER CADA ATIVIDADE NO FORMULÁRIO DE REGISTRO – FOLHA 2)

*Faça a pergunta para cada atividade. Se para uma atividade a resposta for **NÃO**, então marque **0 (ZERO)** tanto para gravidade como também para a frequência e passe para a próxima atividade. Se a resposta for **SIM**, leia as Perguntas: a) Gravidade, b) Frequência e c) Problemas Percebidos, para cada atividade.*

#### **Pergunta a) Gravidade**

Vou fazer algumas perguntas sobre a gravidade desta dificuldade quando ela aconteceu.

Observe a escala abaixo de 1 a 3. A gravidade da dificuldade aumenta da esquerda para a direita da escala. A figura 1 representa **pequena dificuldade**, a figura 2 representa **média dificuldade** e a figura 3 representa **grande dificuldade** (Usar a escala do quadro 1).

Qual número você acha que reflete o efeito da dificuldade para \_\_\_\_\_ (LER A ATIVIDADE) no seu dia a dia?

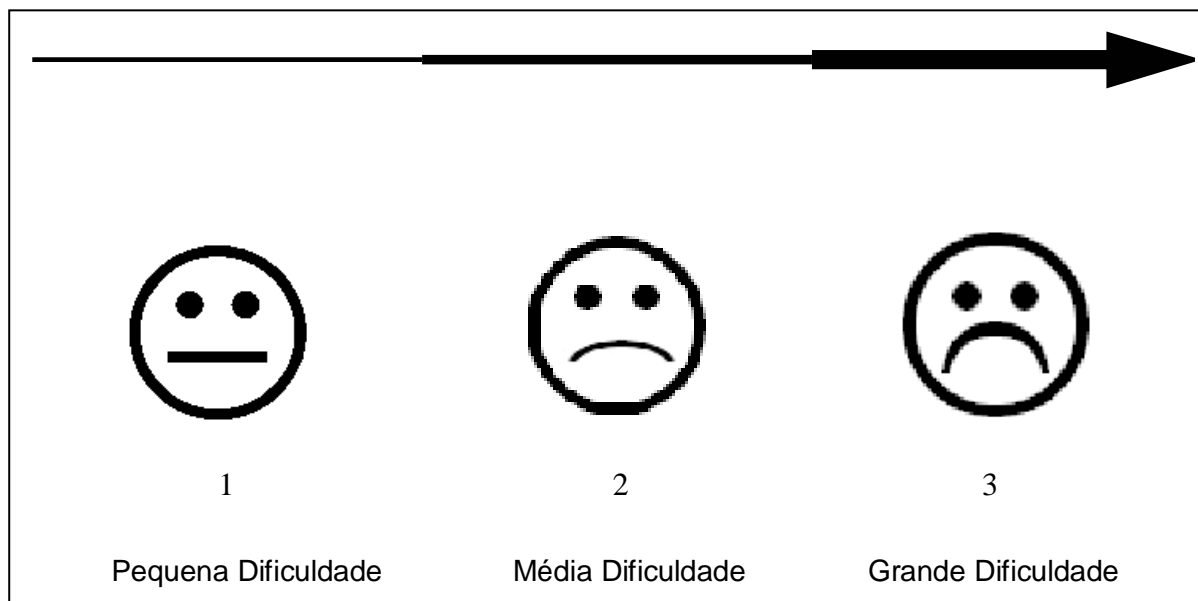

Quadro 1 - Escala analógica e facial

#### **Pergunta b) Frequência**

Aconteceu uma ou mais vezes por mês ou menos de uma vez por mês?

- 1- Se aconteceu uma ou mais vezes por mês, siga para a Pergunta b1
- 2- Se aconteceu menos de uma vez por mês, siga para a Pergunta b2

Pergunta b1) Se aconteceu uma ou mais vezes por mês:

- |                                                              |   |
|--------------------------------------------------------------|---|
| - Uma ou duas vezes por mês                                  | 1 |
| - Três ou mais vezes ao mês ou uma ou duas vezes por semana. | 2 |
| - Três ou mais vezes por semana                              | 3 |

Pergunta b2) Se a dificuldade aconteceu menos de uma vez por mês, por quantos dias aconteceu no total?

- |                       |   |
|-----------------------|---|
| - 1 a 7 dias          | 1 |
| - 8 a 15 dias         | 2 |
| - mais do que 15 dias | 3 |

### Pergunta c) Problemas Percebidos

Nesse momento a criança deve ter a Folha 1 em mãos e cada atividade do Formulário de Registro deve ser lida e relacionada com os problemas marcados. Escreva na coluna “Problema(s)” o(s) código(s) do(s) problema(s) assinalado(s) pela criança na Folha 1, que tenha(m) afetado a “Atividade” da linha correspondente.

Por exemplo: se a atividade “Comer (ex. refeição, sorvete)” estiver sendo dificultada por “Dor de dente”, “Cárie ou buraco no dente” e “Dente de leite mole” devem ser marcados os códigos 1, 3 e 4 na coluna “Problema(s)”.

Observação: se a resposta da Folha 1 incluir “Outros”, escreva o(s) problema(s) por extenso.

De acordo com os problemas de sua boca e de seus dentes, listados na Folha 1 (da 1ª Etapa), você pode dizer qual(is) deles causou (causaram) dificuldade para \_\_\_\_\_ ?  
(LER CADA ATIVIDADE NO FORMULÁRIO DE REGISTRO - FOLHA 2)

- 1- Dor de dente
  - 2- Dentes sensíveis (quando come ou bebe: doces, alimentos quentes como leite ou café e gelados como sorvete)
  - 3- Cárie ou buraco no dente
  - 4- Dente de leite mole
  - 5- Espaço entre os dentes (porque um dente permanente, novo ou definitivo, não nasceu)
  - 6- Dente permanente (novo ou definitivo) quebrado
  - 7- Cor do dente (ex. mais amarelado, escuro ou manchado)
  - 8- Forma ou tamanho do dente (ex. dente com forma ou tamanho anormal, maior ou menor que os outros)
  - 9- Posição do dente (ex. dentes encavalados, trepados, tortos, para fora ou separados)
  - 10- Sangramento na gengiva (ex. quando escova os dentes)
  - 11- Gengiva inchada (ex. inflamada, ou mais avermelhada)
  - 12- Tártaro
  - 13- Feridas na boca
  - 14- Mau hálito (bafo)
  - 15- Boca ou rosto deformados (ex. lábio leporino, fenda palatina)
  - 16- Dente permanente (novo ou definitivo) nascendo
  - 17- Dente permanente (novo ou definitivo) perdido, faltando ou arrancado
- Outros Quais? \_\_\_\_\_

Quadro 2 - Códigos da lista de problemas bucais preenchida na 1ª Etapa

**Índice de Impactos Odontológicos no Desempenho das Atividades Diárias da Criança (OIDP-Infantil)**

Número do termo de consentimento: \_\_\_\_\_ Data da aplicação: \_\_\_\_\_ / \_\_\_\_\_ / \_\_\_\_\_

Escola: \_\_\_\_\_ Turma: \_\_\_\_\_ Idade: \_\_\_\_\_ anos

Nome: \_\_\_\_\_

Data de nascimento: \_\_\_\_\_ / \_\_\_\_\_ / \_\_\_\_\_ Sexo: ( ) masculino ( ) feminino

**1ª Etapa:** Nos últimos três meses, desde \_\_\_\_\_, você teve algum problema na sua boca ou nos seus dentes?

Marque com um X o(s) problema(s) que você tem ou teve nos últimos 3 meses.

- ( ) Dor de dente
- ( ) Dentes sensíveis (quando come ou bebe: doces, alimentos quentes como leite ou café e gelados como sorvete)
- ( ) Cárie ou buraco no dente
- ( ) Dente de leite mole
- ( ) Espaço entre os dentes (porque um dente permanente, novo ou definitivo, não nasceu)
- ( ) Dente permanente (novo ou definitivo) quebrado
- ( ) Cor do dente (ex. mais amarelado, escuro ou manchado)
- ( ) Forma ou tamanho do dente (ex. dente com forma ou tamanho anormal, maior ou menor que os outros)
- ( ) Posição do dente (ex. dentes encavalados, trepados, tortos, para fora ou separados)
- ( ) Sangramento na gengiva (ex. quando escova os dentes)
- ( ) Gengiva inchada (ex. inflamada, ou mais avermelhada)
- ( ) Tártaro
- ( ) Feridas na boca
- ( ) Mau hálito (bafo)
- ( ) Boca ou rosto deformados (ex. lábio leporino, fenda palatina)
- ( ) Dente permanente (novo ou definitivo) nascendo
- ( ) Dente permanente (novo ou definitivo) perdido, faltando ou arrancado
- ( ) Outros Quais? \_\_\_\_\_

**Formulário de Registro OIDP-Infantil**

| <b>Atividades</b>                                                                                | <b>a)Gravidade</b> | <b>b)Frequência</b> |           | <b>c)Problema(s)</b> |
|--------------------------------------------------------------------------------------------------|--------------------|---------------------|-----------|----------------------|
|                                                                                                  |                    | <b>b1</b>           | <b>b2</b> |                      |
| 1. Comer (ex. refeição, sorvete)                                                                 |                    |                     |           |                      |
| 2. Falar claramente                                                                              |                    |                     |           |                      |
| 3. Limpar a boca (ex. escovar os dentes e bochechar)                                             |                    |                     |           |                      |
| 4. Dormir                                                                                        |                    |                     |           |                      |
| 5. Manter o seu estado emocional (humor) sem se irritar ou estressar                             |                    |                     |           |                      |
| 6. Sorrir, rir e mostrar os dentes sem sentir vergonha                                           |                    |                     |           |                      |
| 7. Fazer as tarefas da escola (ex. ir à escola, aprender em sala de aula, fazer o dever de casa) |                    |                     |           |                      |
| 8. Ter contato com as pessoas (ex. sair com amigos, ir à casa de um amigo)                       |                    |                     |           |                      |
